# Supplementary material for: Combination of electroporation delivered metabolic modulators with low-dose chemotherapy in osteosarcoma
Source: PubMed Central journal article supplement (PMC6101145; doi:10.18632/oncotarget.25843), 2018-07-31
Supplement: oncotarget-09-31473-s001.pdf [file oncotarget-09-31473-s001.pdf]

## Combination of electroporation delivered metabolic modulators with low-dose chemotherapy in osteosarcoma

### SUPPLEMENTARY MATERIALS

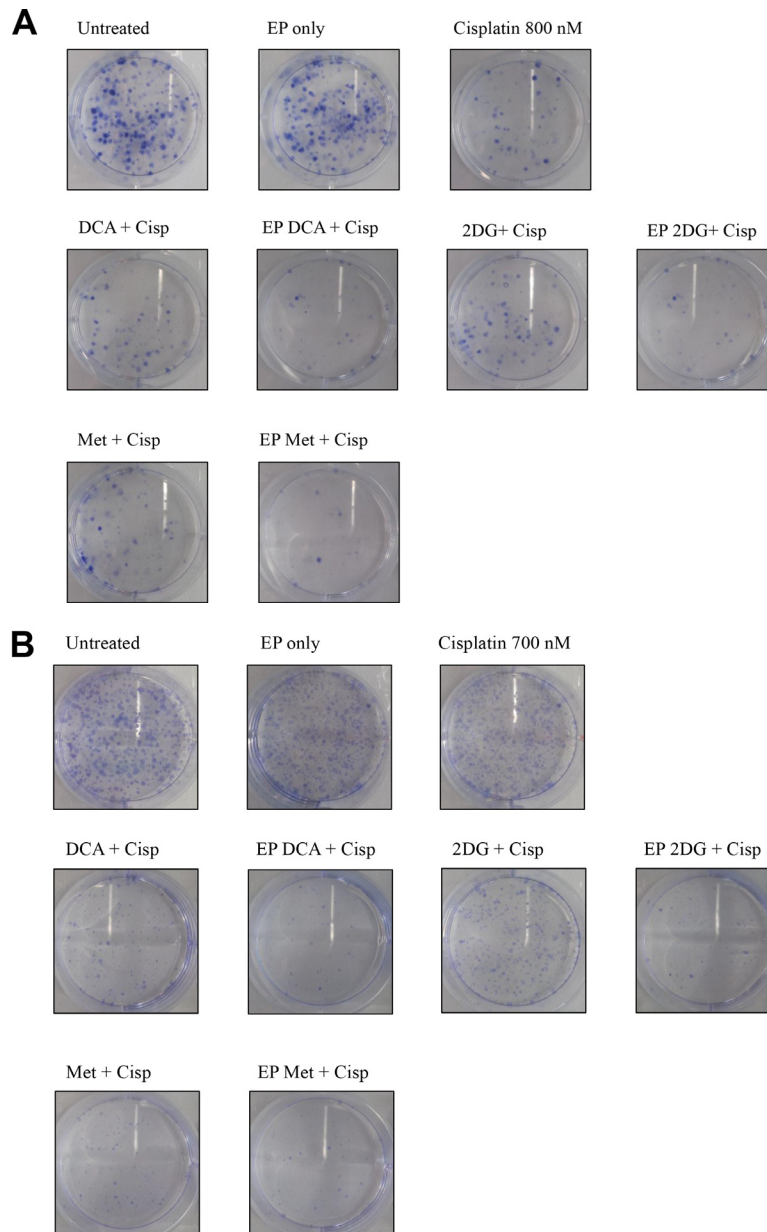

**Supplementary Figure 1: Sensitivity of OS cells to low-dose chemotherapy increases when treated with metabolic modulators using EP first.** Sensitivity of (A) K7M2 and (B) Saos2 cell lines treated with metabolic modulators actively (with EP) or passively (without EP), combined with low-dose Cisplatin was evaluated by stained colonies formed in Cisplatin-treated media over a period of time. Picture of each well shown is a representative image of at least nine similar wells (three independent experiments).
